# Supplementary material for: Low-cost coenzyme Q10 as an efficient electron transport layer for inverted perovskite solar cells
Source: Royal Society of Chemistry journal article supplement (doi:10.1039/c9ta06317j), 2019-01-01
Supplement: c9ta06317j1.pdf [file c9ta06317j1.pdf]

## Supplementary Information

### Low-Cost Coenzyme Q10 as Efficient Electron Transport Layer for Inverted Perovskite Solar Cells

Lisha Xie,<sup>a,b</sup> Jianwei Wang,<sup>a</sup> Kejun Liao,<sup>a,b</sup> Jin-an Yang,<sup>a,b</sup> Aili Wang,<sup>a,b</sup> Xiaoyu Deng,<sup>a,b</sup> Chengbo Li,<sup>a,b</sup> Tingshuai Li,<sup>a,b,\*</sup> Xiaobin Niu,<sup>a,\*</sup> and Feng Hao<sup>a,b,\*</sup>

<sup>a</sup> School of Materials and Energy, University of Electronic Science and Technology of China, Chengdu 610054, China.

<sup>b</sup> Center for Applied Chemistry, University of Electronic Science and Technology of China, Chengdu 611731, P.R. China

Email: [litingshuai@uestc.edu.cn](mailto:litingshuai@uestc.edu.cn); [xbniu@uestc.edu.cn](mailto:xbniu@uestc.edu.cn); [haofeng@uestc.edu.cn](mailto:haofeng@uestc.edu.cn)

## Experimental details

### 1) PL measurement

The steady PL spectra and TRPL decay measurements were performed using an Flou Time 300(PicoQuant). The TRPL and steady-state PL measurements were conducted using prepared samples: glass/perovskite or glass/perovskite/Q10 or FTO/perovskite/PC<sub>61</sub>BM. The excitation wavelength of 560nm for PL measurement and 809nm for TRPL measurement. The PL measurements were conducted in the wavelength range from 500 to 900 nm. The PL decay constants were calculated using an equation:

$$y = A_1 \exp\left(-\frac{t}{\tau_1}\right) + A_2 \exp\left(-\frac{t}{\tau_2}\right) + y_0 \quad (1)$$

where, A is the decay amplitude, and  $\tau$  is the decay time.

### 2) Device characterization

The  $J$ - $V$  characteristics were measured by Keithley 2400 source and the solar simulator with standard AM 1.5G (100 mW.cm<sup>-2</sup>) under ambient conditions. The  $J$ - $V$  curves of all devices were measured by reverse (1.1 V to -0.1 V) or forward (-0.1 V to 1.1 V) with 0.028 V s<sup>-1</sup> of scan rate. The active area of device is 0.096 cm<sup>2</sup>. The conductivity of ETLs was calculated by following equation:

$$\sigma = \frac{Id}{VA} \quad (2)$$

where, A is the active area (0.096 cm<sup>2</sup>), d is the thickness of the samples, V is the apply bias, and I is real-time current.

### 3) SCLC measurement

The device structure of FTO/perovskite/ETL/Ag was measured using CHI 660E electrochemical workstation (Ch Instrument Company) (0 V to 3V) to evaluate the trap densities of devices. The trap densities were calculated using the following equation:

$$V_{TFL} = \frac{qn_t d^2}{2\epsilon\epsilon_0} \quad (3)$$

where  $V_{TFL}$  is the trap-filled limit voltage, q is the elementary charge,  $n_t$  is the trap density, d is the film thickness,  $\epsilon$  is the dielectric constant, and  $\epsilon_0$  is the vacuum

permittivity.

#### 4) Mott–Schottky measurement

The device structure is FTO/perovskite/ETL/Ag, using CHI 660E electrochemical workstation (Ch Instrument Company) (0 V to 1V). Doping density was calculated using the Mott–Schottky equation, as follows:

$$\frac{1}{C^2} = \frac{2}{\epsilon\epsilon_0 q A^2 N} (V_{bi} - V) \quad (4)$$

$$W_p = \left[ \frac{2\epsilon\epsilon_0}{qN} (V - V_{bi}) \right]^{0.5} \quad (5)$$

where C is the capacitance,  $\epsilon$  is dielectric constant 46.9,  $\epsilon_0$  is the permittivity of free space, q is the elementary charge, A is the active area (0.096 cm<sup>2</sup>), N is the doping density of the semiconductor, V is the applied bias, and  $W_p$  is depletion zone width.

#### 5) DFT calculation details

The cutoff energy of plane-wave in these calculations is set to 500 eV. The calculated supercell combines coenzyme Q10 or PC<sub>61</sub>BM and a FAPbI<sub>3</sub> supercell of 1 × 8 × 8 in the unit of its primitive cell. The Brillouin zone was sampled using  $\Gamma$  point only, which is decided by considering the large size of this supercell and our limited computational resources. The charge transfer happens at the interface between coenzyme Q10 or PC<sub>61</sub>BM and FAPbI<sub>3</sub>. The charge density difference plotting in Figure.3(a) and (c) shows that there are significant charge transfers at their interfaces. The charge transfers mainly take place across the interfaces.

To get quantity insights of the charge transfers at the interface, Bader charge analysis code<sup>1-4</sup> have been used to quantify the charge variations of all atoms which are labeled on the atomic structure plots of Figure. 3(b) and (d).

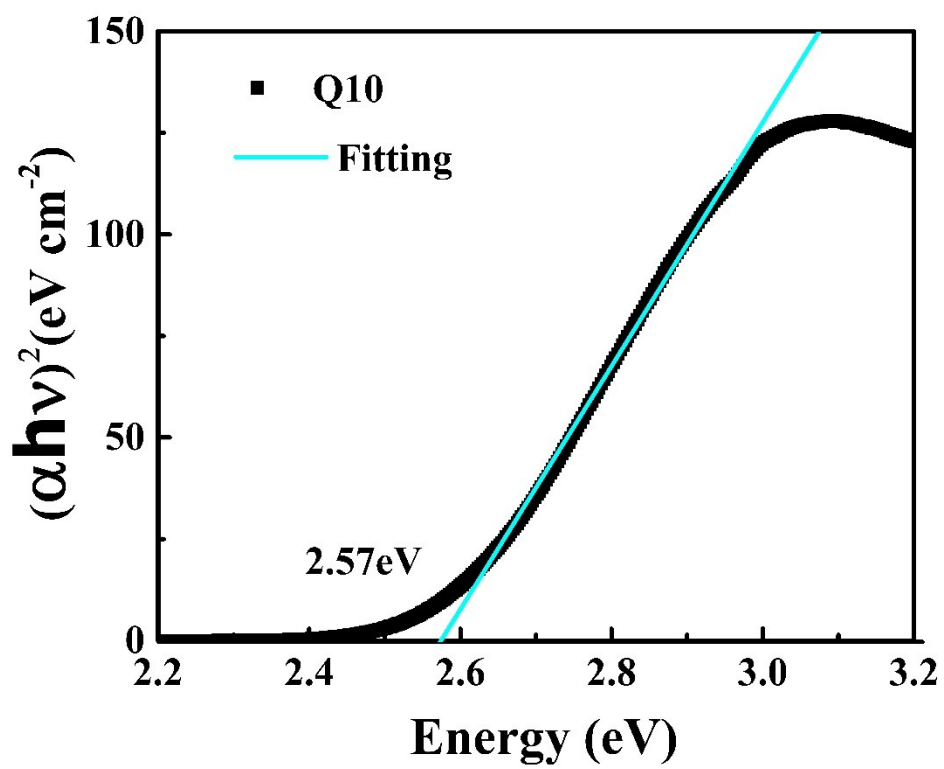

Fig. S1 Absorbance spectra of Q10.

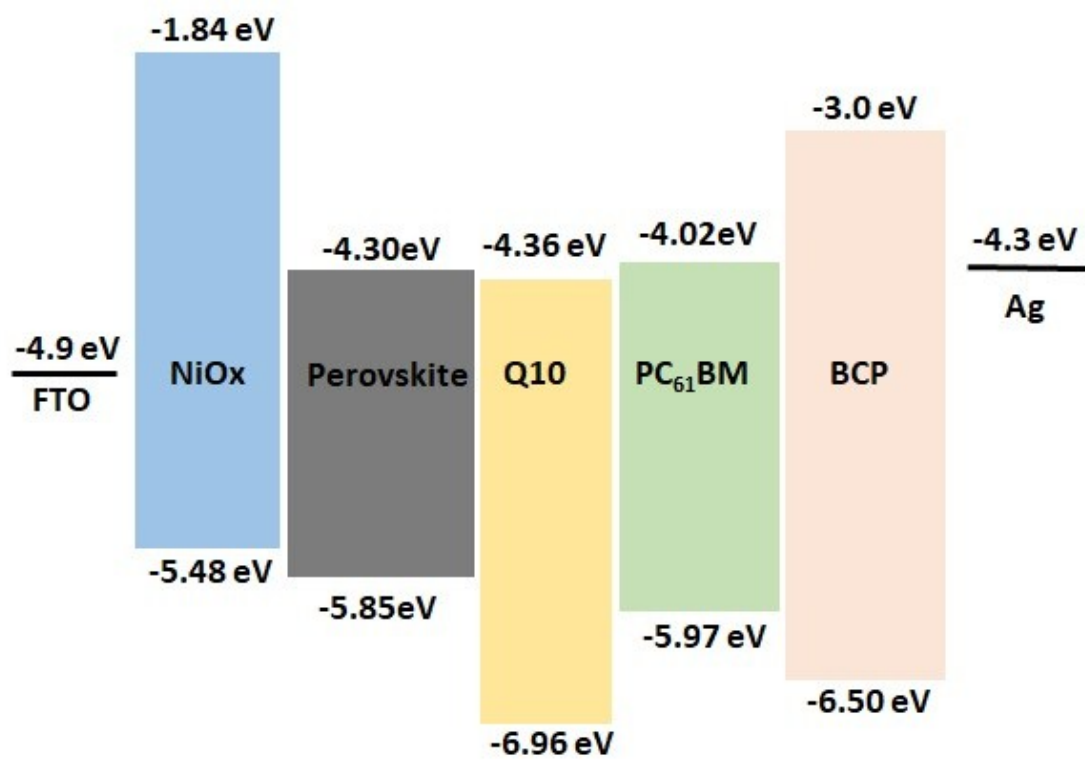

**Fig. S2** The energy diagram of the PSC with Q10 and PC<sub>61</sub>BM ETLs.

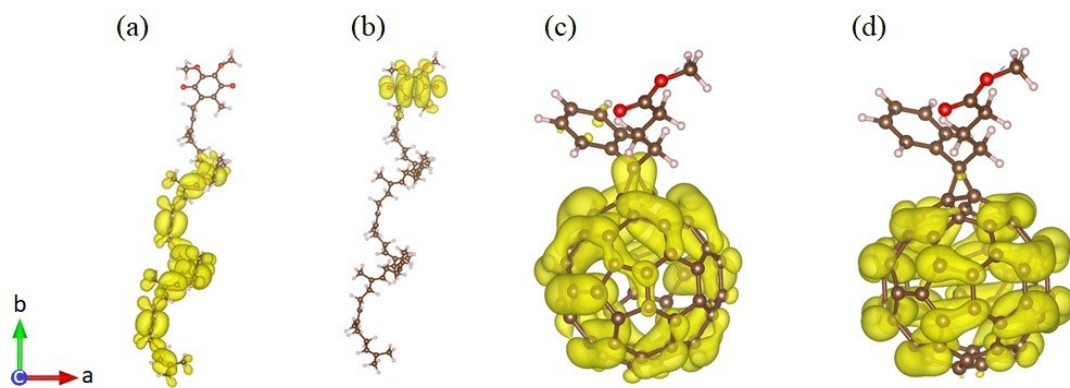

**Fig. S3** The charge distribution of HOMO (a) and LUMO (b) of Q10, HOMO (c) and LUMO (d) of PC<sub>61</sub>BM.

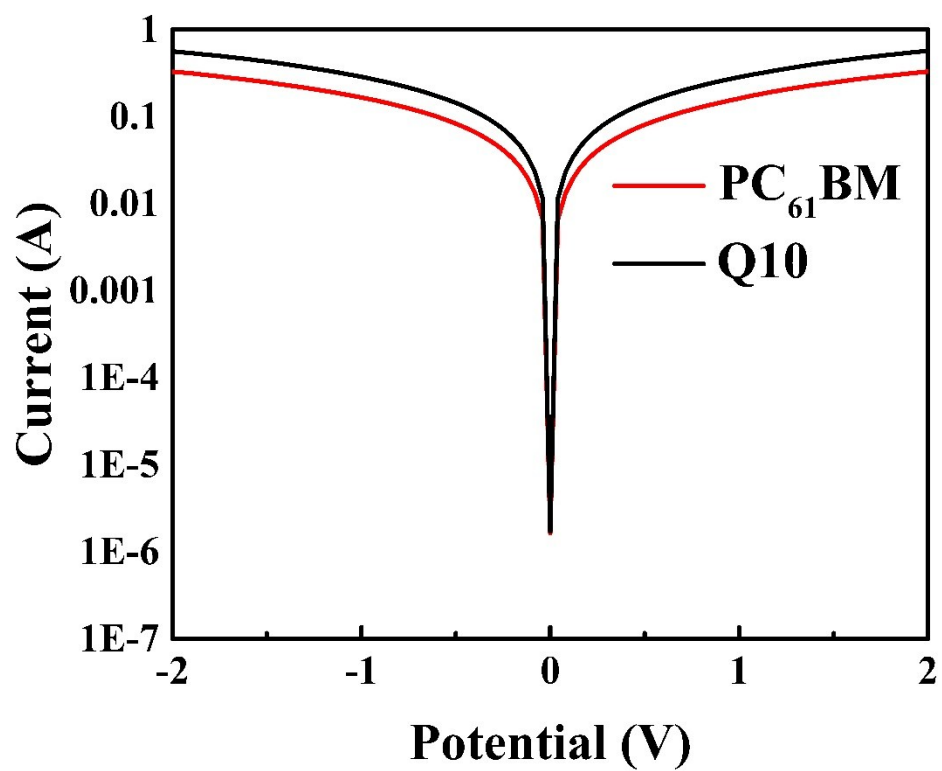

**Fig. S4**  $I-V$  curves of conductivity measurements of Q10 and  $PC_{61}BM$  under dark conditions.

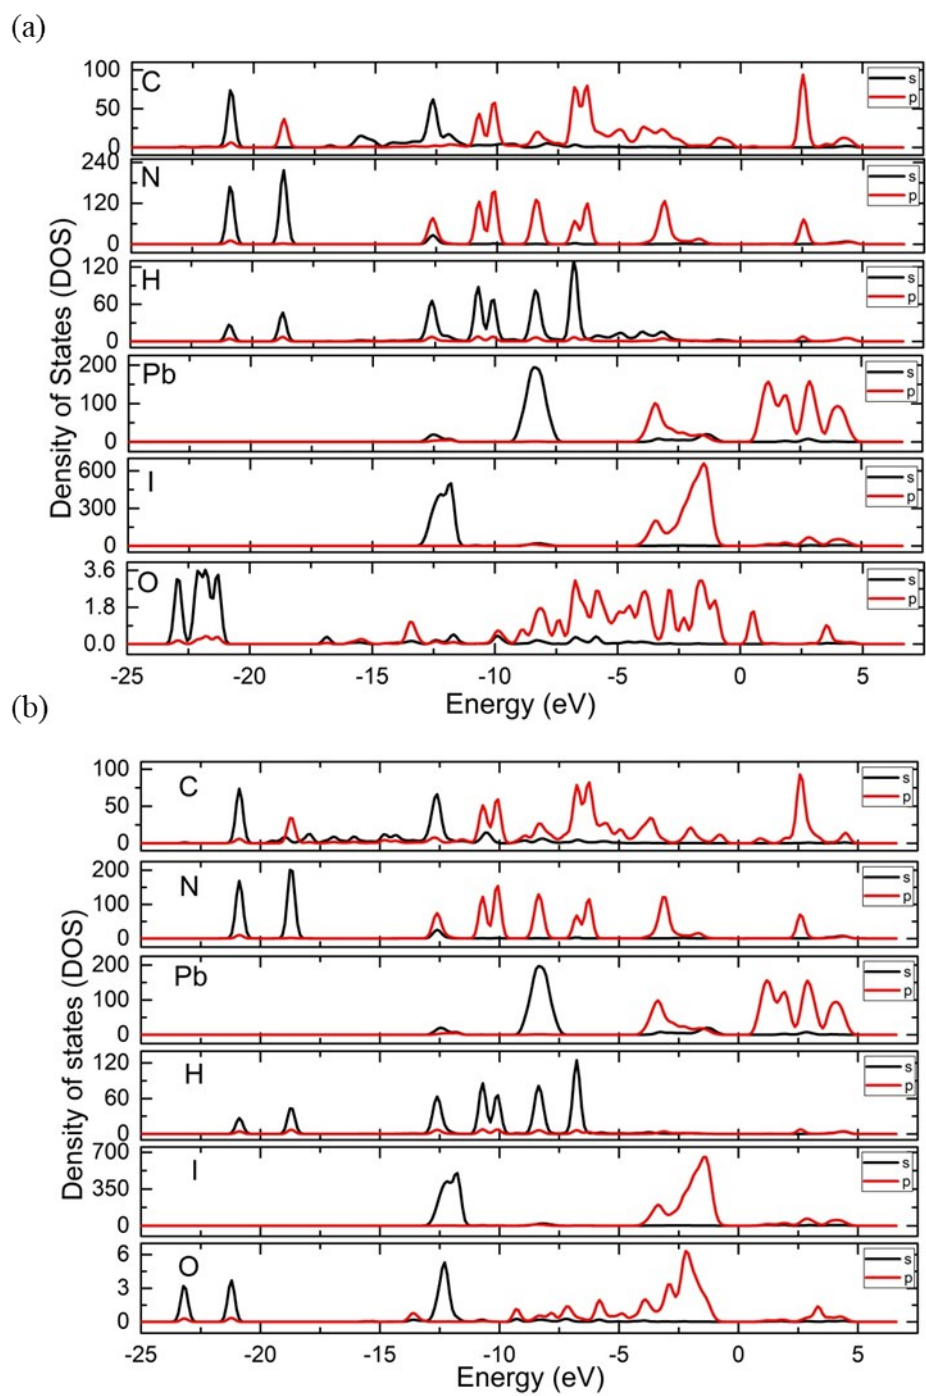

**Fig. S5** Partial density of states for (a) Q10/FAPbI<sub>3</sub> and (b) PC<sub>61</sub>BM/FAPbI<sub>3</sub>.



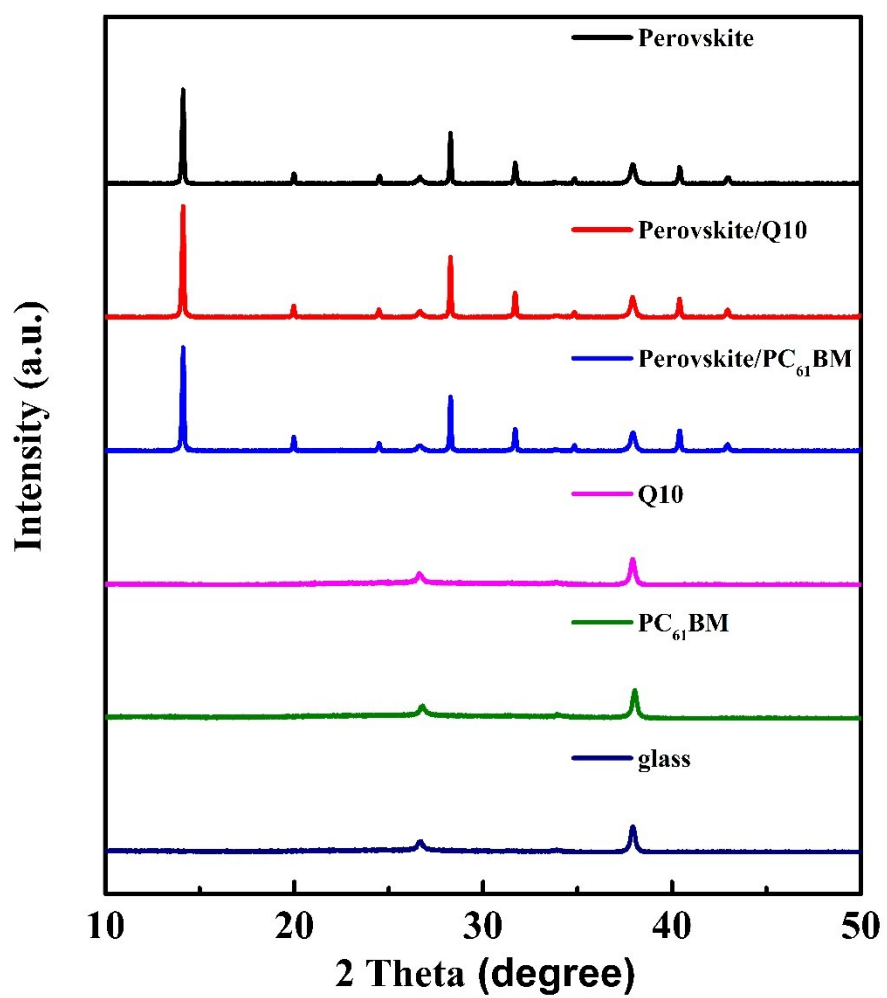

Fig. S6 XRD pattern of FTO, PC<sub>61</sub>BM, Q10, FAMAPbI<sub>3</sub>.

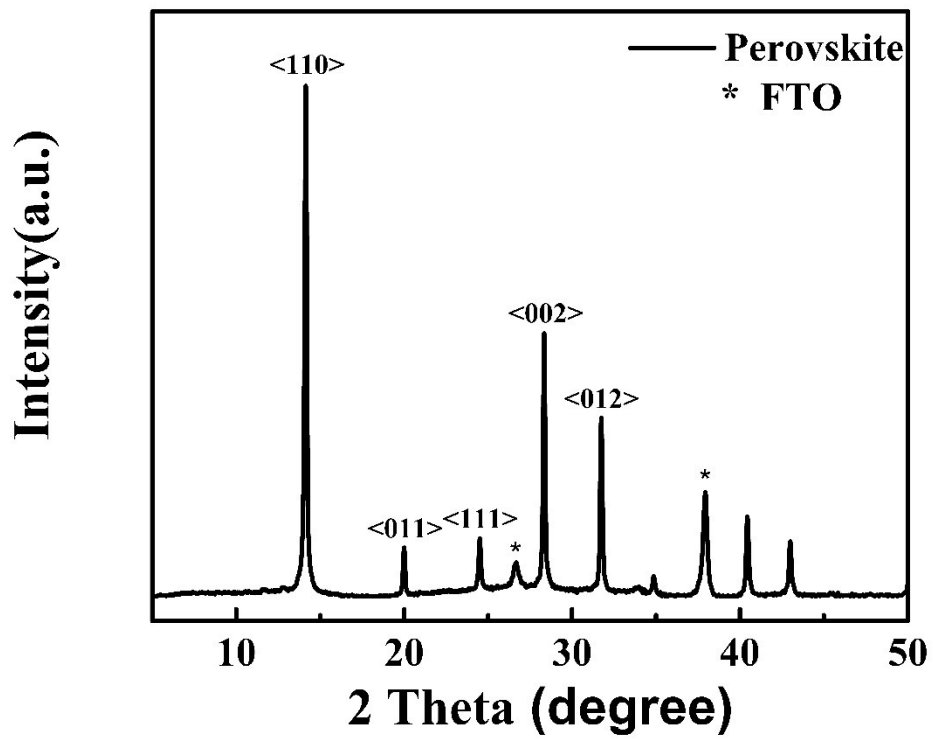

Fig. S7 XRD pattern of FAMAPbI<sub>3</sub>.

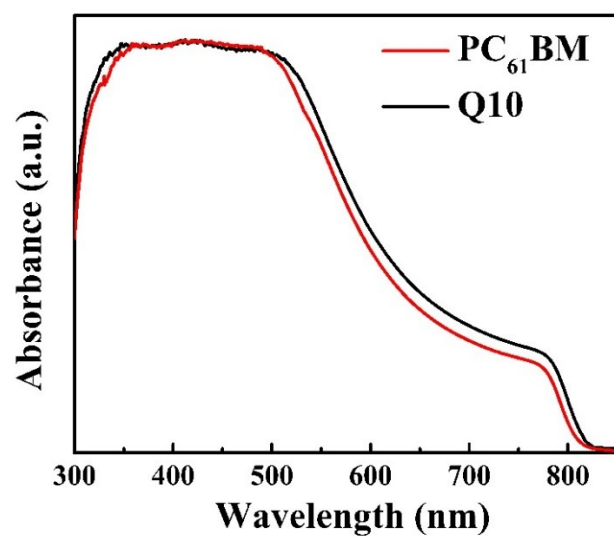

**Fig. S8** UV-vis absorption spectra of FTO/NiO<sub>x</sub>/FAMAPbI<sub>3</sub>/ETL/BCP.

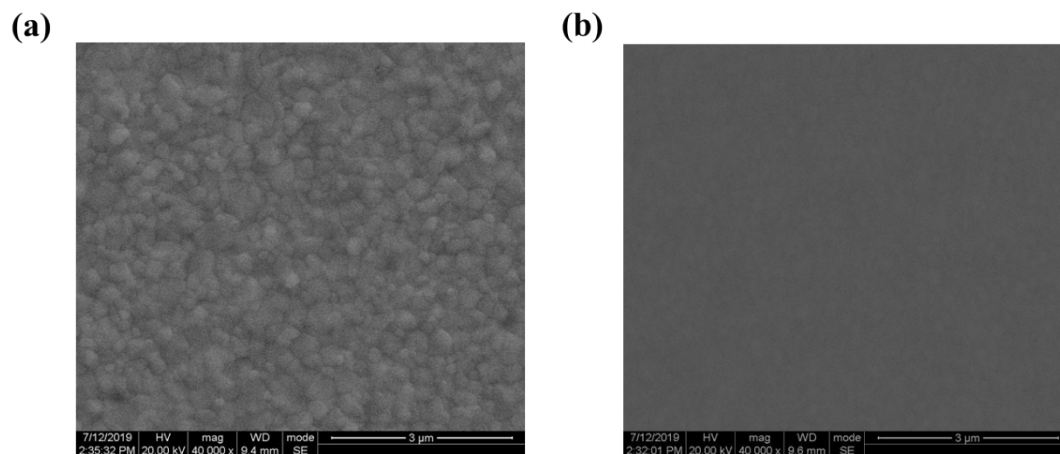

**Fig. S9** Top-view SEM images of perovskite (a) and Q10 covered perovskite (b), the concentration of Q10 solution is 7mg/mL in CB.

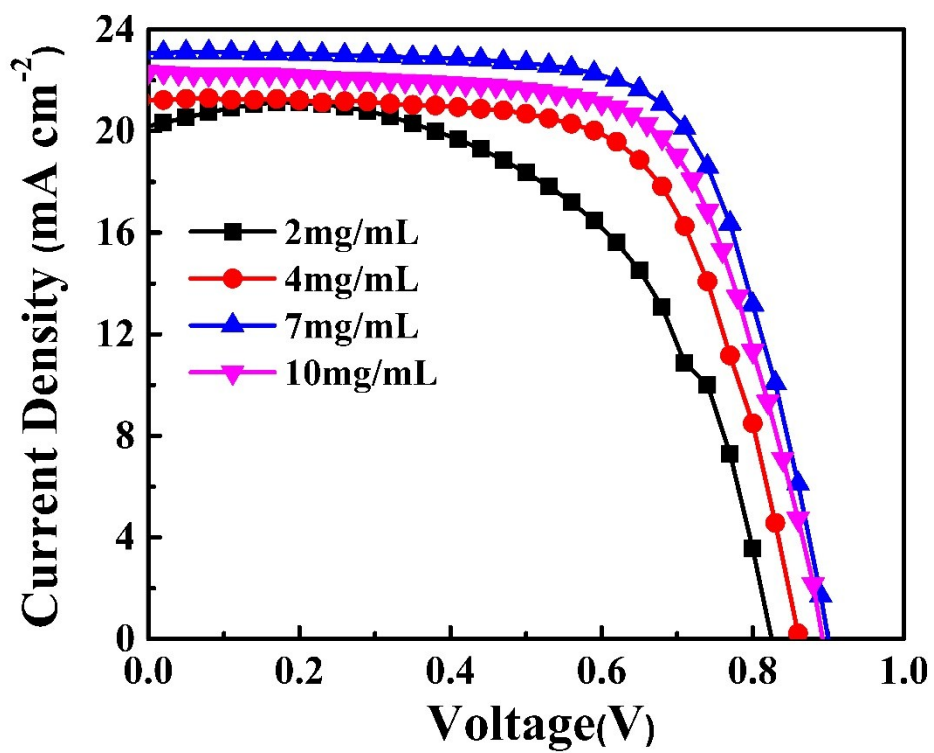

Fig. S10  $J$ - $V$  curves for PSCs with different Q10 concentration.

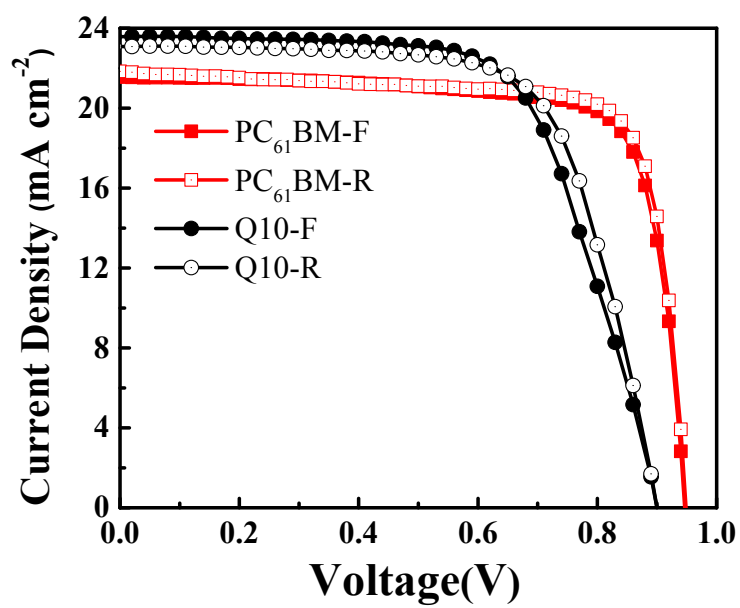

Fig. S11  $J$ - $V$  curves of the champion Q10-based (black) and PC<sub>61</sub>BM-based (red) device, F means forward scan and R means reverse scan.

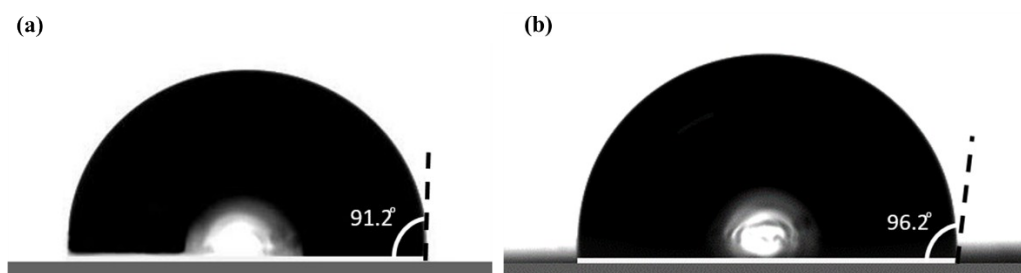

**Fig. S12** The water contact angle of PC<sub>61</sub>BM (a) and Q10 (b) deposited on a perovskite film surface.

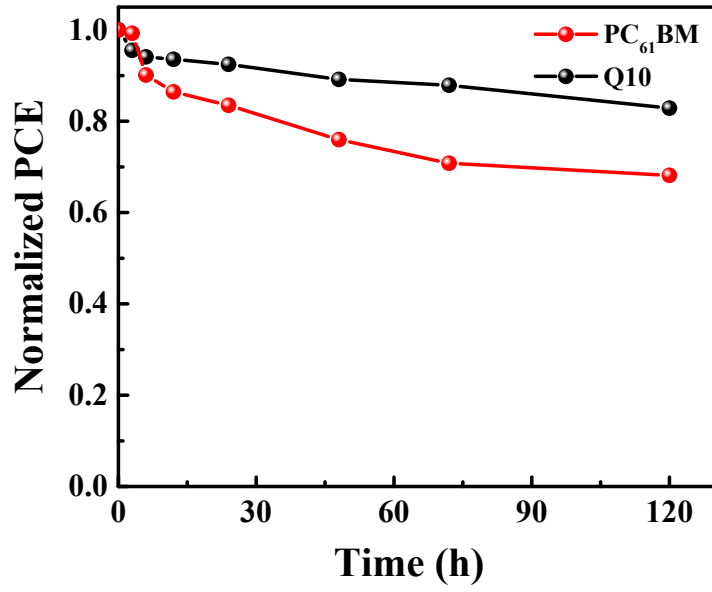

**Fig. S13** Stability test of the unencapsulated devices in ambient air with Q10 or PC<sub>61</sub>BM as ETL (stored under air condition of 30 C, 25% relative humidity).



**Table S1.** Calculated conductivities of each ETL.

| ETL                 | Slope   | Thickness (nm) | Conductivity (mS cm <sup>-1</sup> ) |
|---------------------|---------|----------------|-------------------------------------|
| Q10                 | 2975.97 | 122.64         | 3.650E-02                           |
| PC <sub>61</sub> BM | 1720.70 | 96.64          | 1.663E-02                           |

**Table S2.** Summary electron lifetimes of each structure.

| structure                      | A <sub>1</sub> (%) | τ <sub>1</sub> (ns) | A <sub>2</sub> (%) | τ <sub>2</sub> (ns) | τ <sub>av</sub> (ns) |
|--------------------------------|--------------------|---------------------|--------------------|---------------------|----------------------|
| Perovskite                     | 23.62              | 6.44                | 76.38              | 51.17               | 40.60                |
| Perovskite/Q10                 | 57.42              | 4.06                | 42.58              | 29.61               | 14.94                |
| Perovskite/PC <sub>61</sub> BM | 43.10              | 3.26                | 56.90              | 21.18               | 13.46                |

**Table S3.**  $V_{\text{TFL}}$  and  $n_{\text{t}}$  trap densities of perovskite/ETL interface.

| ETL                 | d     | $V_{\text{TFL}}$ | $n_{\text{t}}$       |
|---------------------|-------|------------------|----------------------|
|                     | (nm)  | (V)              | ( $\text{cm}^{-3}$ ) |
| Q10                 | 482.5 | 0.953            | 2.12 E+16            |
| PC <sub>61</sub> BM | 469.5 | 0.963            | 2.26 E+16            |

**Table S4.** Slope of the Mott–Schottky plots and doping densities of ETLs.

|                     | slope      | $N_d$ (cm <sup>-3</sup> ) | $V_{bi}$ (V) | $W_p$ (nm) |
|---------------------|------------|---------------------------|--------------|------------|
| Q10                 | -2.658E+08 | 1.227E+20                 | 0.082        | 1.861      |
| PC <sub>61</sub> BM | -6.597E+08 | 4.944E+19                 | 0.119        | 3.532      |

**Table S5.** Detailed photovoltaic performance of different density of Q10-based PSCs.

|          | $J_{sc}$<br>(mA cm <sup>-2</sup> ) | $V_{oc}$<br>(V) | FF<br>(%) | PCE<br>(%) |
|----------|------------------------------------|-----------------|-----------|------------|
| 2mg/mL   | 20.22                              | 0.82            | 58.36     | 9.72       |
| 4mg/ mL  | 21.26                              | 0.86            | 67.15     | 12.26      |
| 7mg/ mL  | 23.11                              | 0.90            | 68.94     | 14.34      |
| 10mg/ mL | 22.30                              | 0.89            | 67.39     | 13.42      |

**References:**

1. G. Henkelman, A. Arnaldsson and H. Jónsson, *Comput. Mater. Sci.*, 2006, **36**, 354-360.
2. E. Sanville, S. D. Kenny, R. Smith and G. Henkelman, *J. Comput. Chem.*, 2007, **28**, 899-908.
3. W. Tang, E. Sanville and G. Henkelman, *J. Phys.: Condens. Matter*, 2009, **21**, 084204.
4. M. Yu and D. R. Trinkle, *J. Chem. Phys.*, 2011, **134**, 064111.
